# Supplementary material for: In cellulo serial crystallography of alcohol oxidase crystals inside yeast cells
Source: PubMed Central journal article supplement (PMC4775156; doi:10.1107/s2052252515022927), 2016-01-12
Supplement: m-03-00088-sup1.pdf [file m-03-00088-sup1.pdf]

# IUCrJ

**Volume 3 (2016)**

**Supporting information for article:**

***In cellulo* serial crystallography of alcohol oxidase crystals  
inside yeast cells**

**Arjen J. Jakobi, Daniel M. Passon, Kèvin Knoops, Francesco Stellato,  
Mengning Liang, Thomas A. White, Thomas Seine, Marc Messerschmidt,  
Henry Chapman and Matthias Wilmanns**

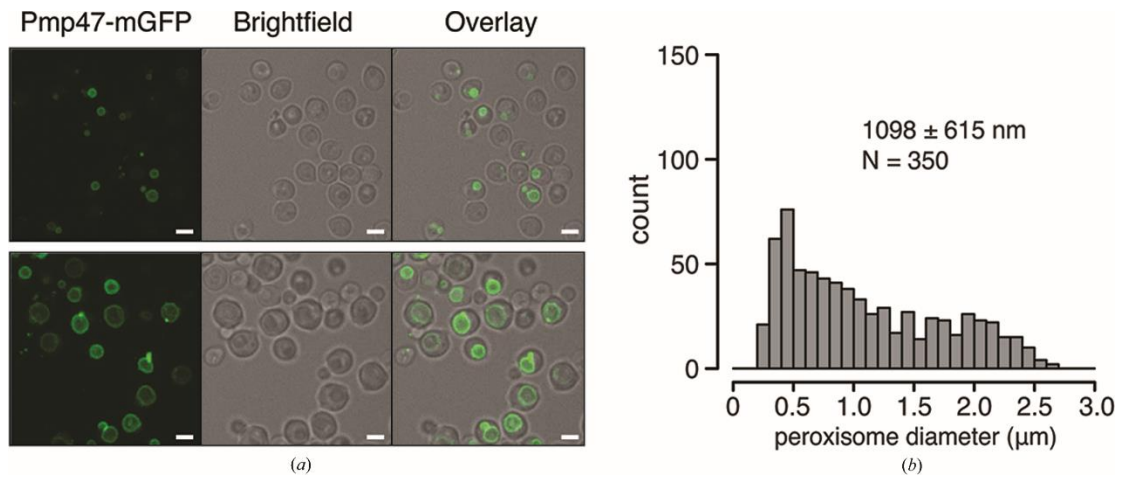

**Figure S1** (a) Brightfield and fluorescence images for total (top) and enriched (bottom) fractions of  $\Delta PEX11$  cell suspensions. Scale bars represent  $2 \mu\text{m}$ . (b) Size distribution of Pmp47-mGFP labeled  $\Delta PEX11$  peroxisomes from enriched fractions of  $\Delta PEX11$  cells show an increase in the fraction of very large peroxisomes (cf. Figure 1d–e).

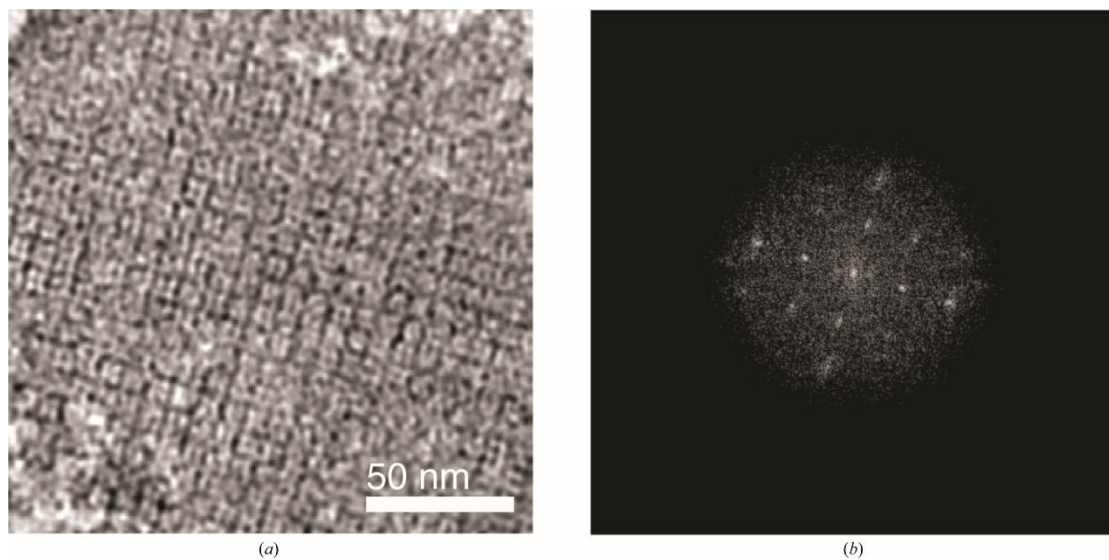

**Figure S2** (a) Representative digital electron tomogram slice of freeze-substituted AO crystallites in *Hp* peroxisomes with tetragonal arrangement of AO octamers viewed along [001]. (b) Fourier amplitude spectrum of (a) reflecting the discrete cubic lattice of AO in *Hp* peroxisomes.

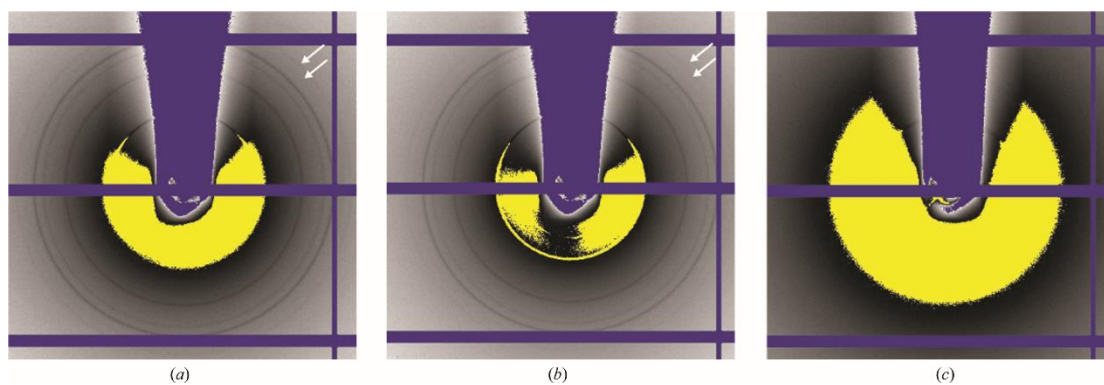

**Figure S3** X-ray powder diffraction patterns of (a) *wt*, (b)  $\Delta$ *PEX11* and (c)  $\Delta$ *PEX5* cells at higher threshold level than shown in Figure 2 (b–d) reveal additional, higher resolution Debye-Scherrer rings for *wt* and  $\Delta$ *PEX11* cells (arrows).
